# Supplementary material for: Norepinephrine metabolite DOPEGAL activates AEP and pathological Tau aggregation in locus coeruleus
Source: JCI journal article supplement (doi:10.1172/jci130513), 2019-12-02

## **Supplemental informaion**

### **Supplemental Figure 1. NE, DA, and DOPAL trigger Tau degradation *in vitro*.**

**A.** Recombinant Tau (1  $\mu$ g) was incubated with NE, DA, or DOPAL of 0, 2.5, 25, 125, or 250  $\mu$ M in a 37 °C shaker for 24 h. Immunoblotting showed that NE, DA, and DOPAL dose-dependently induced Tau degradation. **B.** NE, DA, and DOPAL time-dependently stimulated Tau degradation from 2 to 24 h. **C.** Silver staining confirmed that Tau was dose- and time-dependently degraded by NE and DOPAL. **D.** Enhanced Tau fibrilization by DOPEGAL was demonstrated by electron microscopy. Scale bar = 100 nm.

### **Supplemental Figure 2. MAO-A or aberrant Tau overexpression induces AEP activation, Tau N368 cleavage, and cell death in SH-SY5Y cells.**

SH-SY5Y cells were transfected with MAO-A or MAO-B. **A.** Western blot analysis was conducted on cell lysates using antibodies against AEP and different forms of Tau with  $\beta$ -actin as a control. **B.** The activation of MAO-A in transfected cells was confirmed by enzymatic assay. **C.** AEP enzymatic assay showed that the overexpression of MAO-A and MAO-B activated AEP. Data are shown as mean  $\pm$  SEM. N=3 per group. \*  $p < 0.05$ . **D.** DOPEGAL conversion by MAO-A overexpression was verified by HPLC analysis. Data are shown as mean  $\pm$  SEM. N=3 per group. \*  $p < 0.05$ .  $H_2O_2$  triggered MAO-A and AEP activation. SH-SY5Y cells were pretreated with Clorgyline (10  $\mu$ M), followed by treatment with  $H_2O_2$  (100  $\mu$ M) for 4 h. **E.** Western blot analysis showed that MAO-A and AEP were enhanced by  $H_2O_2$ , and the effects of  $H_2O_2$  were attenuated by the specific MAO-A inhibitor clorgyline. **F.** Activation of MAO-A by  $H_2O_2$  was confirmed by MAO-A enzymatic assay. **G.** AEP enzymatic assay showed that  $H_2O_2$  activation of AEP was inhibited by clorgyline. Data are shown as mean  $\pm$  SEM. N=3 each group. \*  $p < 0.05$ .

Inhibition of NE synthesis reduced H<sub>2</sub>O<sub>2</sub>-induced AEP activation. SH-SY5Y cells were transfected with siRNA for DBH or a control sequence, followed by treatment with H<sub>2</sub>O<sub>2</sub> (100  $\mu$ M) for 4 h. **H.** Western blot analysis showed that inhibition of NE synthesis by knocking down DBH reduced H<sub>2</sub>O<sub>2</sub>-induced AEP activation and Tau N368 cleavage. **I.** H<sub>2</sub>O<sub>2</sub>-induced AEP activity was inhibited by knocking down DBH. Data are shown as mean  $\pm$  SEM. N=3 each group. \*  $p<0.05$ . Tau cleavage by AEP induces SH-SY5Y cell death. SH-SY5Y cells were infected by AAV expressing Tau, Tau N368, Tau P301S or AEP-resistant Tau P301S/N255/368A. **J.** Representative images of cells co-stained for TH (red), Tau (blue) and TUNEL (green). Scale bar = 50  $\mu$ m. **K & L.** Quantification of TUNEL+ cells and LDH assay showed that Tau-induced cell death was inhibited by AEP-resistant uncleavable Tau. Data are shown as mean  $\pm$  SEM. N=3 per group. \*  $p<0.05$ , \*\*  $p<0.01$ . **M.** Western blot analysis showed that TH cell loss was inhibited by uncleavable Tau P301S/N255/368A.

**Supplemental Figure 3. Tau-induced neurotoxicity in SH-SY5Y cells is enhanced by MAO overexpression and attenuated by DBH depletion.**

**A.** SH-SY5Y cells were infected by AAV expressing Tau with MAO-A or MAO-B, or transfected with DBH siRNA. TUNEL was co-stained with TH and Tau. Scale bar = 50  $\mu$ m. **B & C.** Quantification of TUNEL+ cells and LDH assay show that Tau-induced cell death is increased by MAO-A or MAO-B, and is reduced by knockdown of DBH. The activity change of MAO-A (**D**), MAO-B (**E**), and AEP (**F**) by AAV-MAO-A or siDBH was verified by enzymatic assay. Data are shown as mean  $\pm$  SEM. N=3 per group. \*  $p<0.05$ , \*\*  $p<0.01$ . **G.** Western blot analysis shows that MAO-A overexpression induces AEP activation, Tau cleavage, and TH reduction in SH-SY5Y cells. **H.** Primary noradrenergic neurons were transfected with control

siRNA or DBH siRNA, and TUNEL was co-stained with TH. Scale bar = 50  $\mu$ m. **I.** The reduced TUNEL+ neurons by knockdown of DBH were quantified. Data are shown as mean  $\pm$  SEM. N=3 per group. \*  $p < 0.05$ .

**Supplemental Figure 4. DOPEGAL induces Tau neurotoxicity in SH-SY5Y cells.**

**A.** SH-SY5Y cells were transfected with MAO-A or MAO-B, followed by treatment with the MAO-A inhibitor clorgyline (10  $\mu$ M) or the MAO-B inhibitor rasaglyline (10  $\mu$ M). Western blot analysis showed that MAO overexpression induced AEP activation, Tau phosphorylation, and Tau cleavage, and MAO inhibitors blocked these events. **B-D.** The activation of MAO-A (**B**), MAO-B (**C**), and AEP (**D**) was confirmed by enzymatic assay. **E.** LDH assay showed that MAO-A or MAO-B overexpression in SH-SY5Y cells did not induce cell death on their own. Data are shown as mean  $\pm$  SEM. N=3 per group. \*  $p < 0.05$ . **F.** SH-SY5Y cells were transfected with MAO-A, followed by treatment with L-DOPA (200  $\mu$ M), L-DOPS (200  $\mu$ M), or Ascorbic acid (500  $\mu$ M). Immunoblotting showed that MAO-A overexpression induced AEP activation, Tau phosphorylation, and Tau cleavage in the presence of NE precursors. **G & H.** AEP activity and cell death were increased by L-DOPA, L-DOPS, or Ascorbic acid with MAO-A overexpression. Data are shown as mean  $\pm$  SEM. N=3 per group. \*  $p < 0.05$ . **I.** SH-SY5Y cells were transfected with MAO-A and treated with Ascorbic acid (500  $\mu$ M). And then cells were treated with vehicle, the aldehyde dehydrogenase inhibitor Daidzein (10  $\mu$ M), the aldehyde reductase inhibitor Imirestat (1  $\mu$ M), or their combination (D+I) for 24 h. Western blot analysis showed that inhibition of DOPEGAL metabolism induced AEP activation, Tau phosphorylation, and Tau cleavage following facilitation of NE production and MAO-A oxidation. **J & K.** AEP activity and cell death were increased by the treatment of Daidzein, Imirestat, or inhibitors combination

with MAO-A overexpression and ascorbic acid exposure. Data are shown as mean  $\pm$  SEM. N=3 per group. \*  $p<0.05$ .

**Supplemental Figure 5. Tau cleavage by AEP is necessary for Tau pathology progression in LC region.**

**A.** Tau P301S or AEP cleavage-resistant Tau P301S/N255/368A virus was injected into the LC of DBH +/- or DBH -/- mice. Immunofluorescent co-staining showed that Tau N368 and AT8 were increased in the LC of Tau P301S-injected mice 3 months after viral injection, and that these effects were inhibited by DBH knockout or blockade of Tau cleavage. Scale bar = 20  $\mu$ m.

**B.** Gallyas-Braak staining showed that Tau aggregation following infection of Tau P301S was inhibited in DBH -/- mice or by preventing Tau P301S cleavage. Scale bar = 100  $\mu$ m. **C.**

Quantification of aggregated cells from Gallyas-Braak stained images. Data are shown as mean  $\pm$  SEM. N=4 per group. \*  $p<0.05$ . **D.** Representative images of immunofluorescent staining for AT8 (red), ThioS (green), and DAPI (blue) in the HC 3, 6, or 9 months following viral injection. Scale bar = 20  $\mu$ m. **E.** Control or MAO-A AAV were injected into the LC of wild-type (WT) or MAPT transgenic mice, and Tau pathology was assessed 2 months later. Shown are representative images of immunofluorescent staining for AT8 (red), ThioS (green), and DAPI (blue). Scale bar = 20  $\mu$ m.

**Supplemental Figure 6. Viral-mediated Tau expression in the LC drives propagation of pathology to the forebrain in 3xTg transgenic mice.**

LC-specific AAV-PRs8-Tau + AAV-PRs8-mCherry or AAV-PRs8-mCherry alone were injected into the LC of 3xTg mice, and cognition and pathology were assessed 3 months later. **A.**



Representative images of immunofluorescent staining of TH with AT8/ mCherry or N368/mCherry shows that AAV-Tau infection induces Tau phosphorylation and cleavage in LC. Scale bar = 20  $\mu$ m. **B.** Representative images of immunofluorescent staining of TH with AT8/ mCherry or N368/mCherry in Entorhinal cortex (EC), Hippocampus (HC), and Cortex (Cx) sections. Scale bar = 20  $\mu$ m. **C.** Gallyas-Braak staining shows that Tau aggregation induced by Tau is detected in LC, EC, HC, and Cx. Scale bar = 100  $\mu$ m.

**Supplemental Figure 7. Development of Tau pathology in the LC and propagation to the forebrain is dependent on AEP.**

**A.** Primary LC neurons were prepared from neonatal AEP  $+/+$  or AEP  $-/-$  mice and infected with LC specific AAV-PRSx8-Tau or control virus. Upper panels show representative immunofluorescent images for TH (green), total Tau or human Tau (red) in AEP  $+/+$  neurons infected with AAV-PRSx8-Tau or control virus. Lower panels show representative immunofluorescent images for TH (green), AT8 or Tau N368 (red), and DAPI (blue) in AEP  $+/+$  or AEP  $-/-$  neurons infected with AAV-PRSx8-Tau. LC neurons from AEP  $-/-$  mice were resistant to Tau phosphorylation and cleavage. Scale bar = 20  $\mu$ m. **B.** Schematic summary maps of AT8 immunohistochemistry showing Tau pathology spreading from the LC to different brain regions in MAPT, 3XTG, AEP  $+/+$ , and AEP  $-/-$  mice.

**Figure S1**

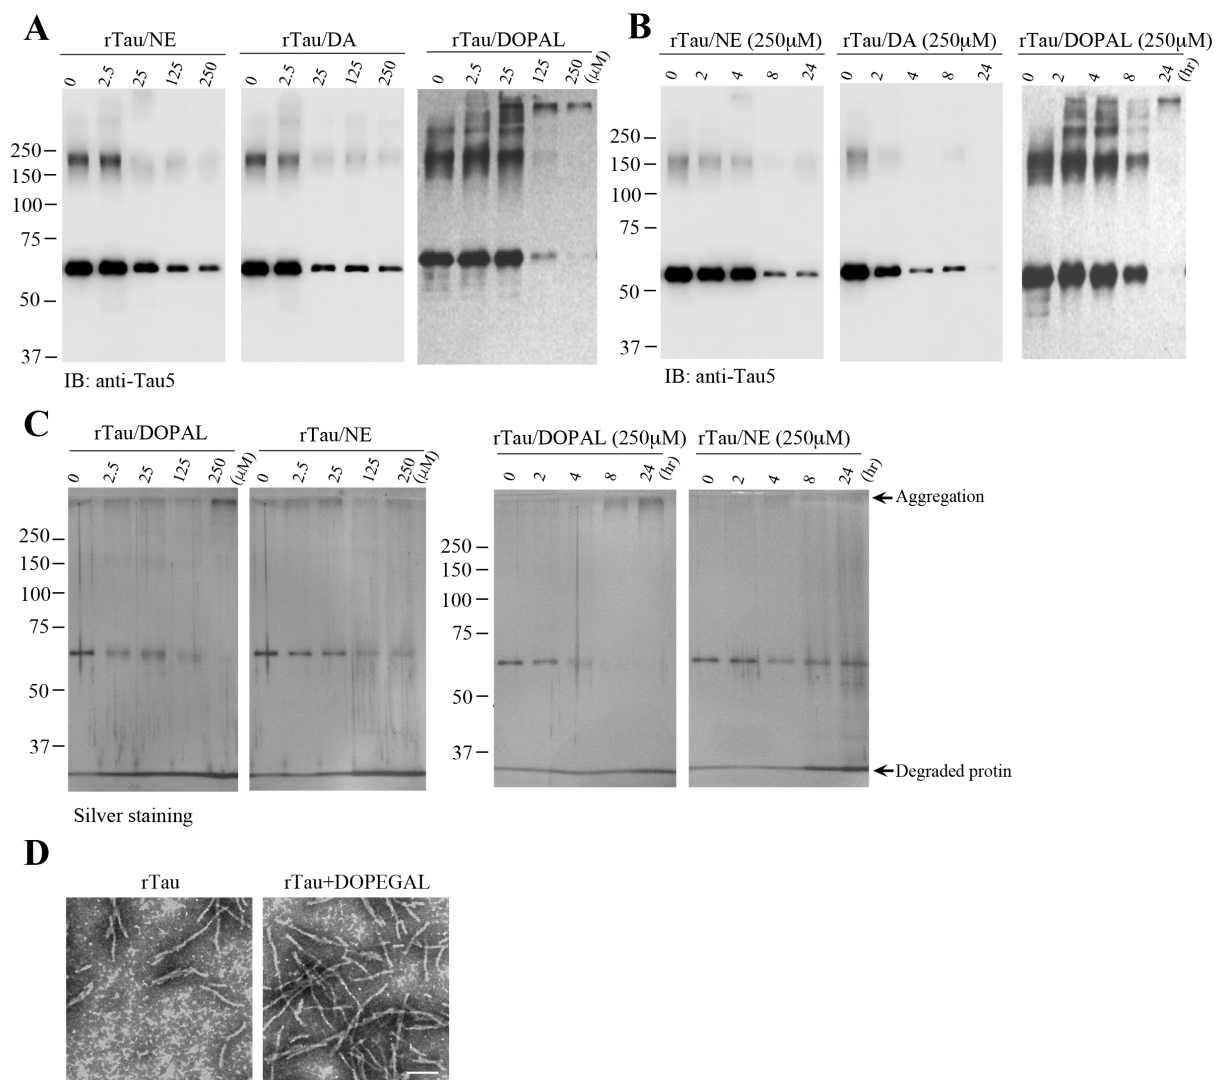

**Figure S2**

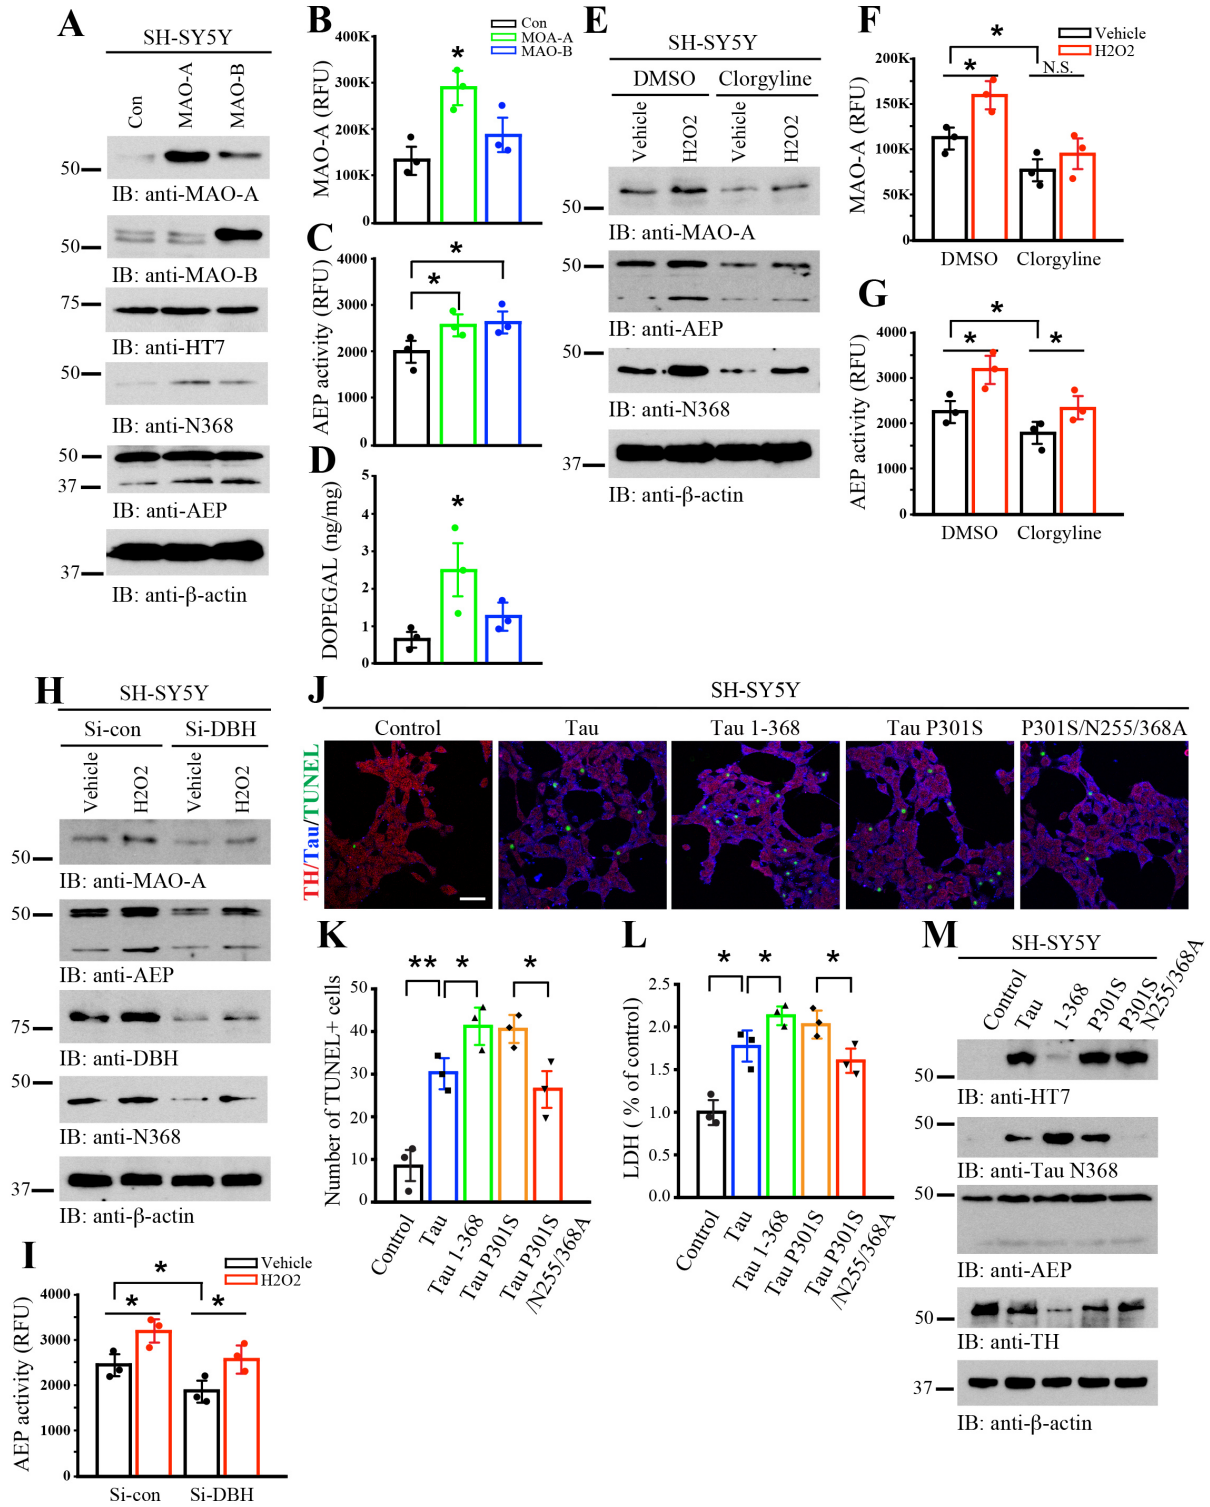

**Figure S3**

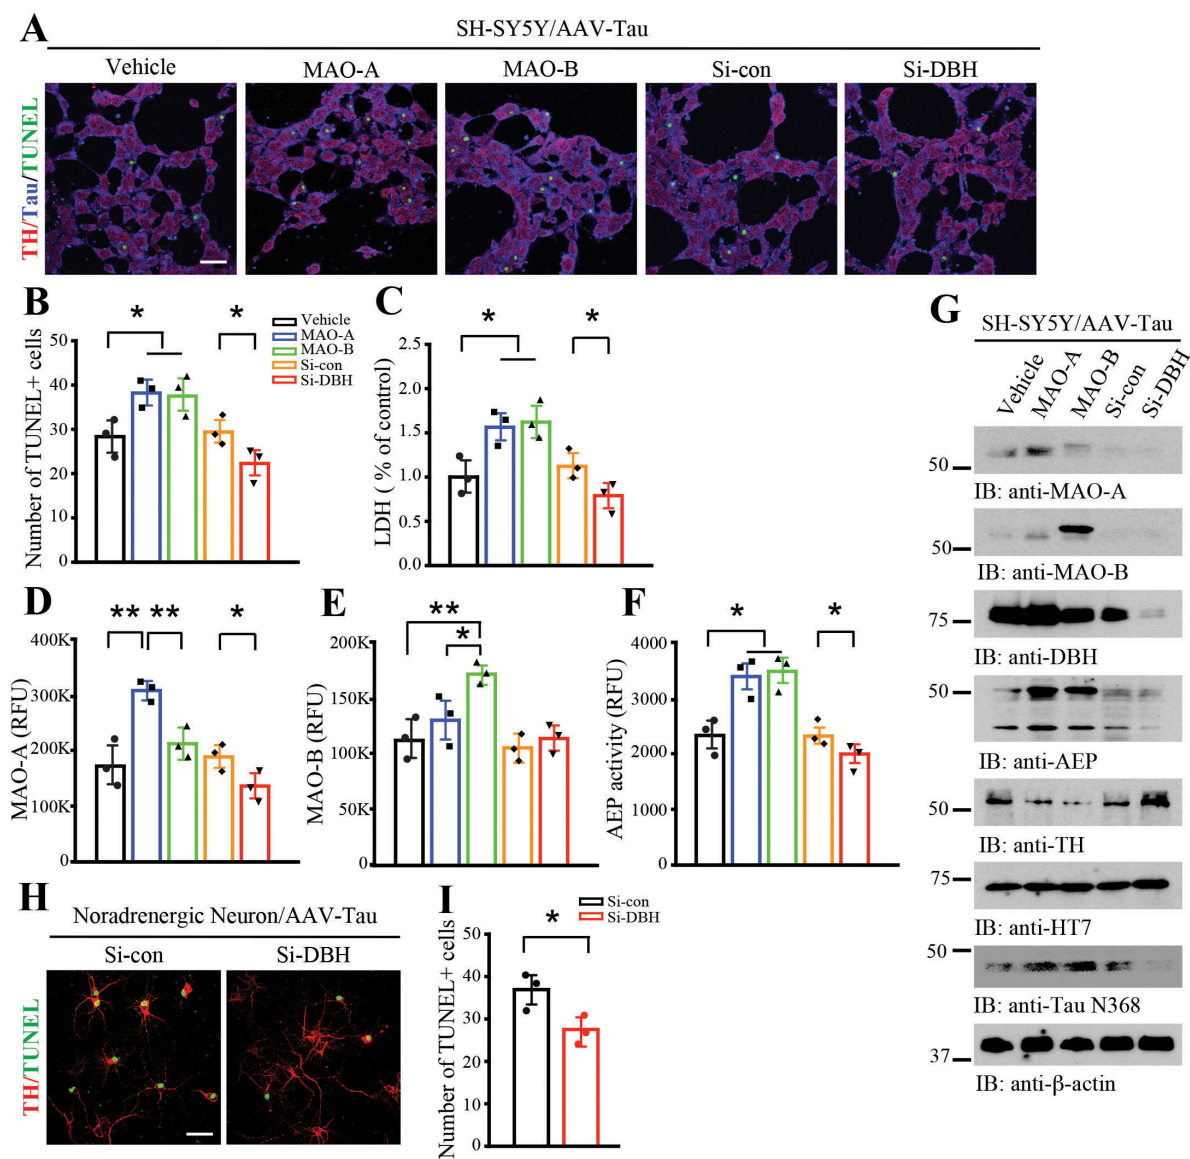

**Figure S4**

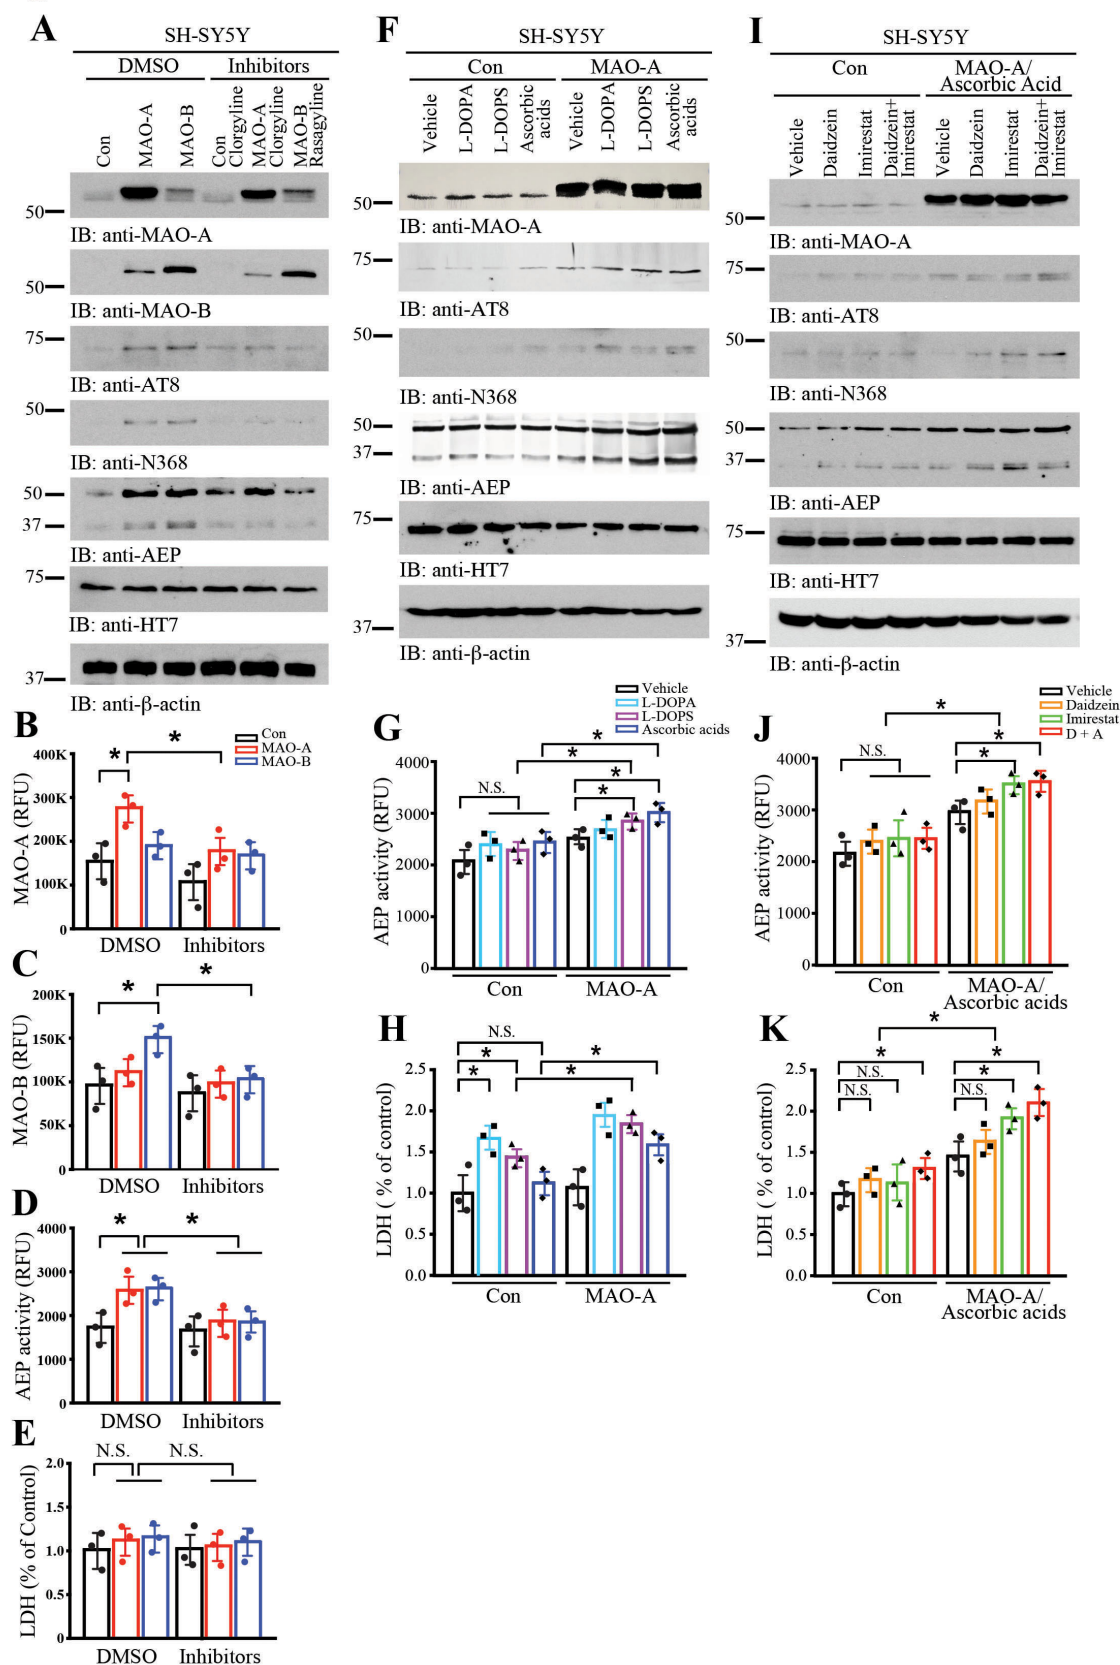



**Figure S5**

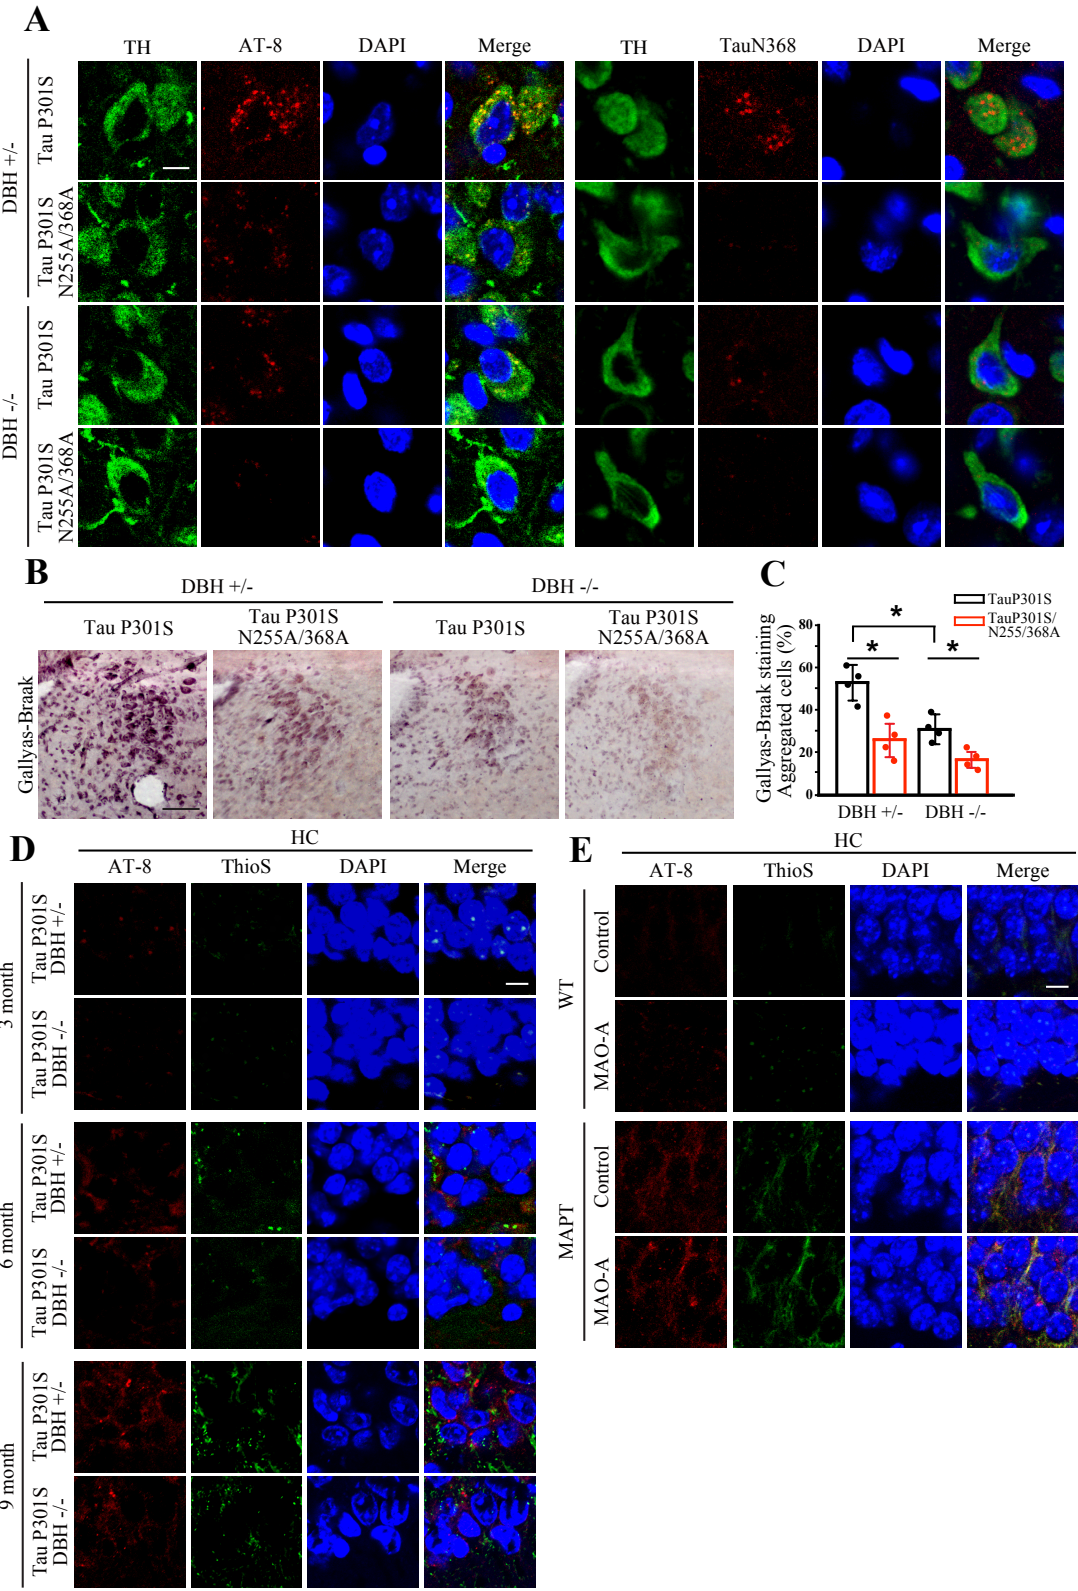

**Figure S6**

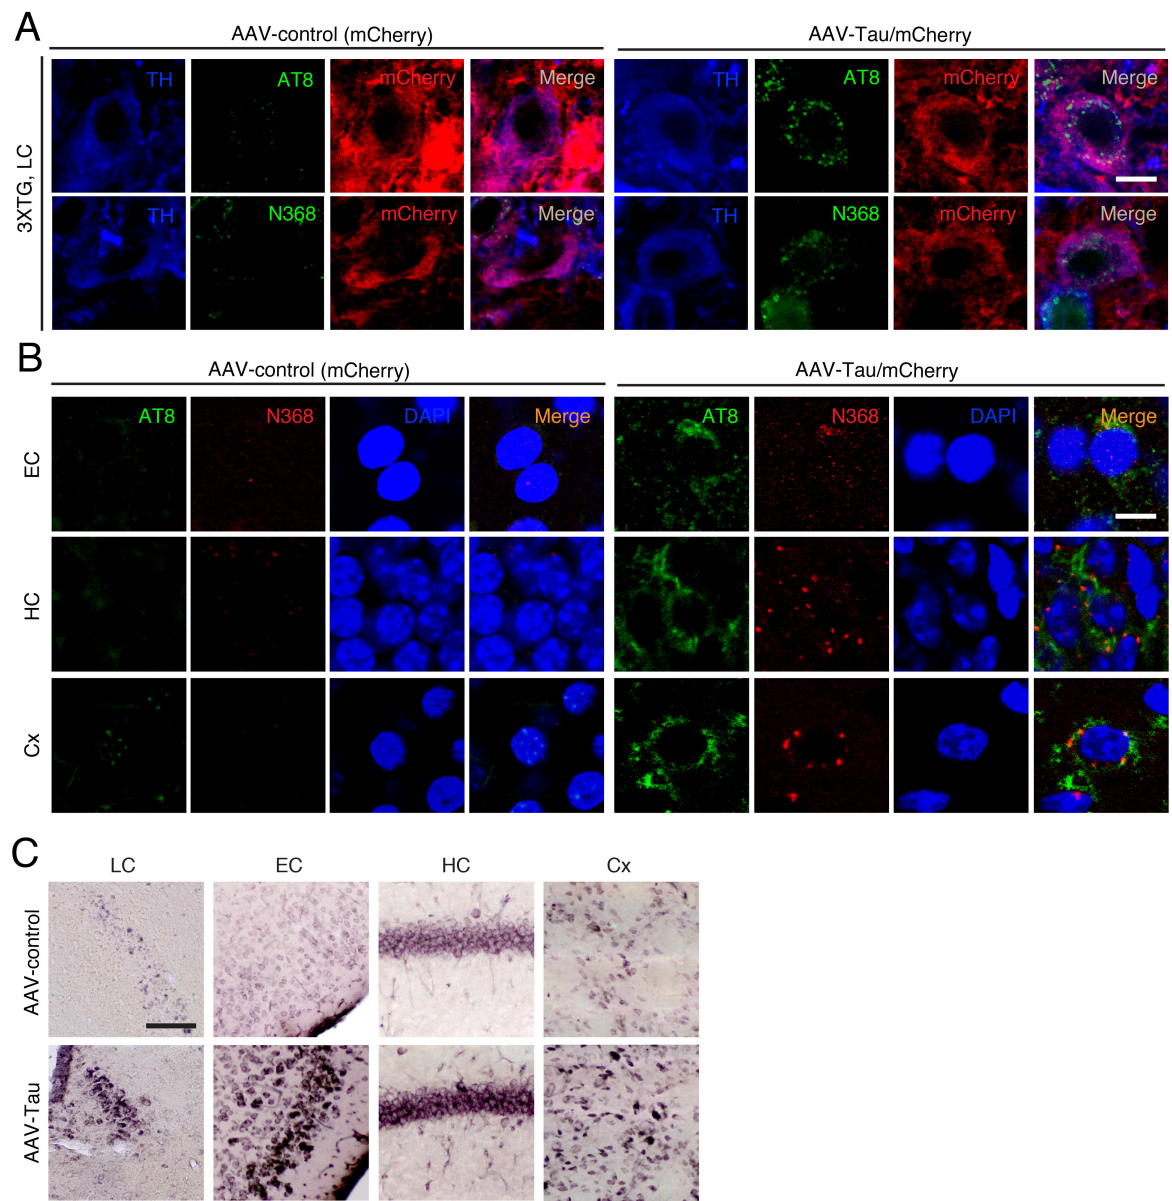

**Figure S7**

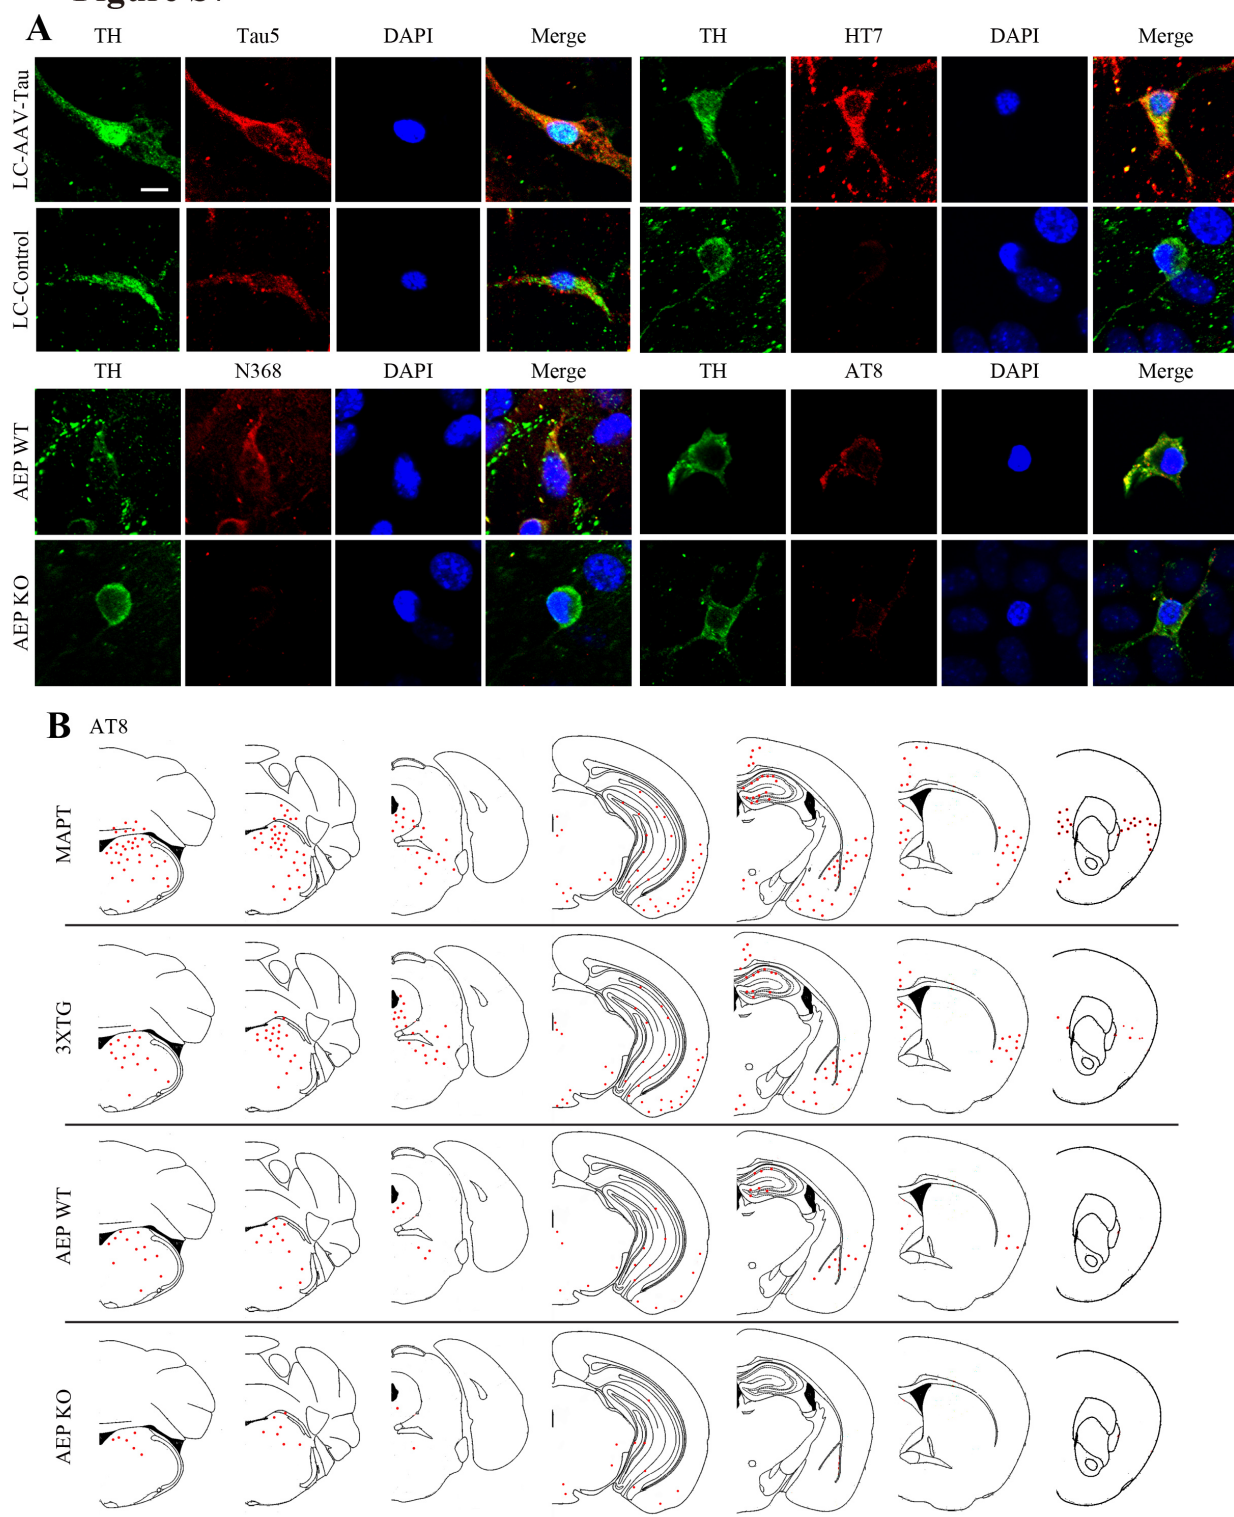

Supplement: sd1 [file 1]
